# Supplementary material
Source: publisher figshare collection journal article supplement (https://tandf.figshare.com/ndownloader/files/16840046)
Supplement: Supplementary file 1 [file 16840046]

Supplementary Material

**Figure S1.** Desorption rate of arsenic-loaded MR-δ-Bi2O3 (Experiment conditions: dose of As-loaded MR-δ-Bi2O3: 400 mg L-1; temperature: 25 ± 1℃; time: 24 h).







**Figure S2.** Bi 4f after arsenic uptake: (a) Bi 4f after As(III) uptake; (b) Bi 4f after As(V) uptake.
